# Supplementary material for: Optimizing the gradient of electric field distribution and inhibiting charge injection in multilayer dielectric films for high capacitive performance
Source: Royal Society of Chemistry journal article supplement (doi:10.1039/d3ta06816a), 2024-01-01
Supplement: d3ta06816a1.pdf [file d3ta06816a1.pdf]

## Supporting Information

### **Optimizing the gradient of electric field distribution and inhibiting charge injection in multilayer dielectric films for high capacitive performance**

Zhicheng Li<sup>a</sup>, Yu Zhang<sup>d</sup>, Zhongbin Pan<sup>a,\*</sup>, Xu Fan<sup>a</sup>, Peng Li<sup>b</sup>, Haiming Huang<sup>d\*</sup>, Weiliang Wang<sup>e</sup>, Weidong Chen<sup>f</sup>, Jinjun Liu<sup>a</sup>, and Weiping Li<sup>c,\*</sup>

<sup>a</sup>School of Materials Science and Chemical Engineering, Ningbo University, Ningbo, Zhejiang, 315211, China. E-mail: panzhongbin@163.com (Zhongbin Pan).

<sup>b</sup>School of Materials Science and Engineering, Liaocheng University, Liaocheng, 252059, China.

<sup>c</sup>Department of Microelectronics Science and Engineering, School of Physical Science and Technology and Laboratory of Clean Energy Storage and Conversion, Ningbo University, Ningbo, Zhejiang, 315211, China. E-mail: liweiping@nbu.edu.cn (Weiping Li)

<sup>d</sup>Solid State Physics & Material Research Laboratory, School of Physics and Materials Science, Guangzhou University, Guangzhou 510006, China. E-mail: huanghm@gzhu.edu.cn (Haiming Huang).

<sup>e</sup>School of Physics, Guangdong Province Key Laboratory of Display Material and Technology, Sun Yat-sen University, Guangzhou 510275, China.

<sup>f</sup>Institute of Corrosion Science and Technology, Guangzhou, Guangdong, 510530, China.

## Experimental

### *Materials*

P(VDF-HFP) powders were purchased from Poly K.  $\text{Ni}(\text{NO}_3)_2 \cdot 6\text{H}_2\text{O}$  (99 %) powders, 1,4-benzenedicarboxylic acid (1,4- $\text{H}_2\text{BDC}$  99 %), N, N-dimethylformamide (DMF, 99.5 %) and acetonitrile ( $\text{C}_2\text{H}_3\text{N}$ , 99.9 %) were purchased from Shanghai Maclean Biochemical Co.

### *Characterization*

The crystal structure of the composite materials was obtained by X-Ray Diffraction (XRD) on a D8 Advance X-ray diffractometer. The dielectric properties of all samples were measured by an LCR (TH 2838A, Changzhou Tonghui Electronics Co., Ltd., China) in the range of  $10^3$  to  $10^6$  Hz. The polarization-electric field ( $P$ - $E$ ) loops were measured by the Premier II Ferroelectric test system (Poly K). The fast discharge tests were performed using a CF-003 test system (Instruments Technology, China).

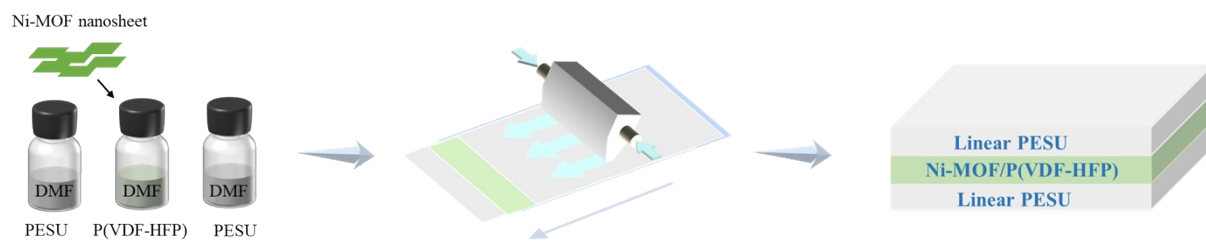

Figure S1. The preparation process of multilayer composite films.

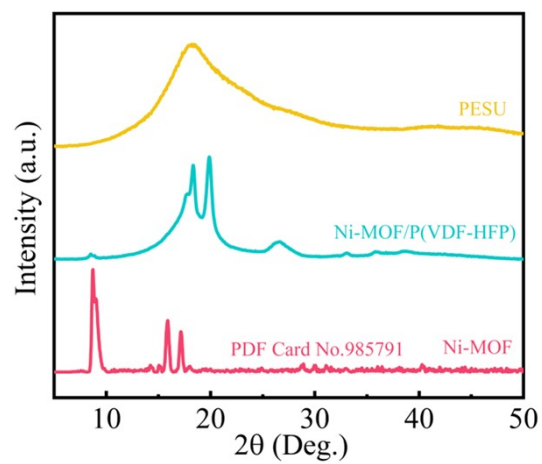

Figure S2. The XRD image of P(VDF-HFP), Ni-MOF/ P(VDF-HFP), and PESU.

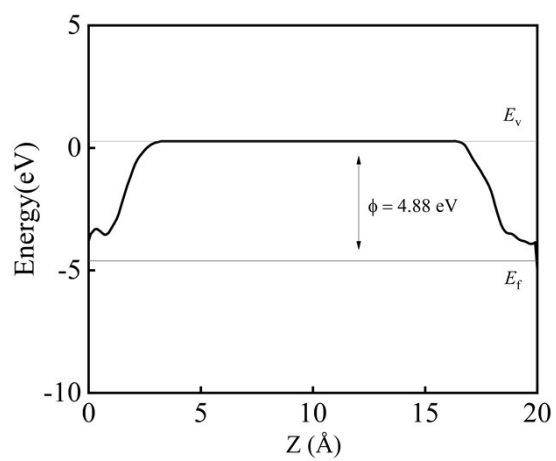

Figure S3. The work function of PESU.

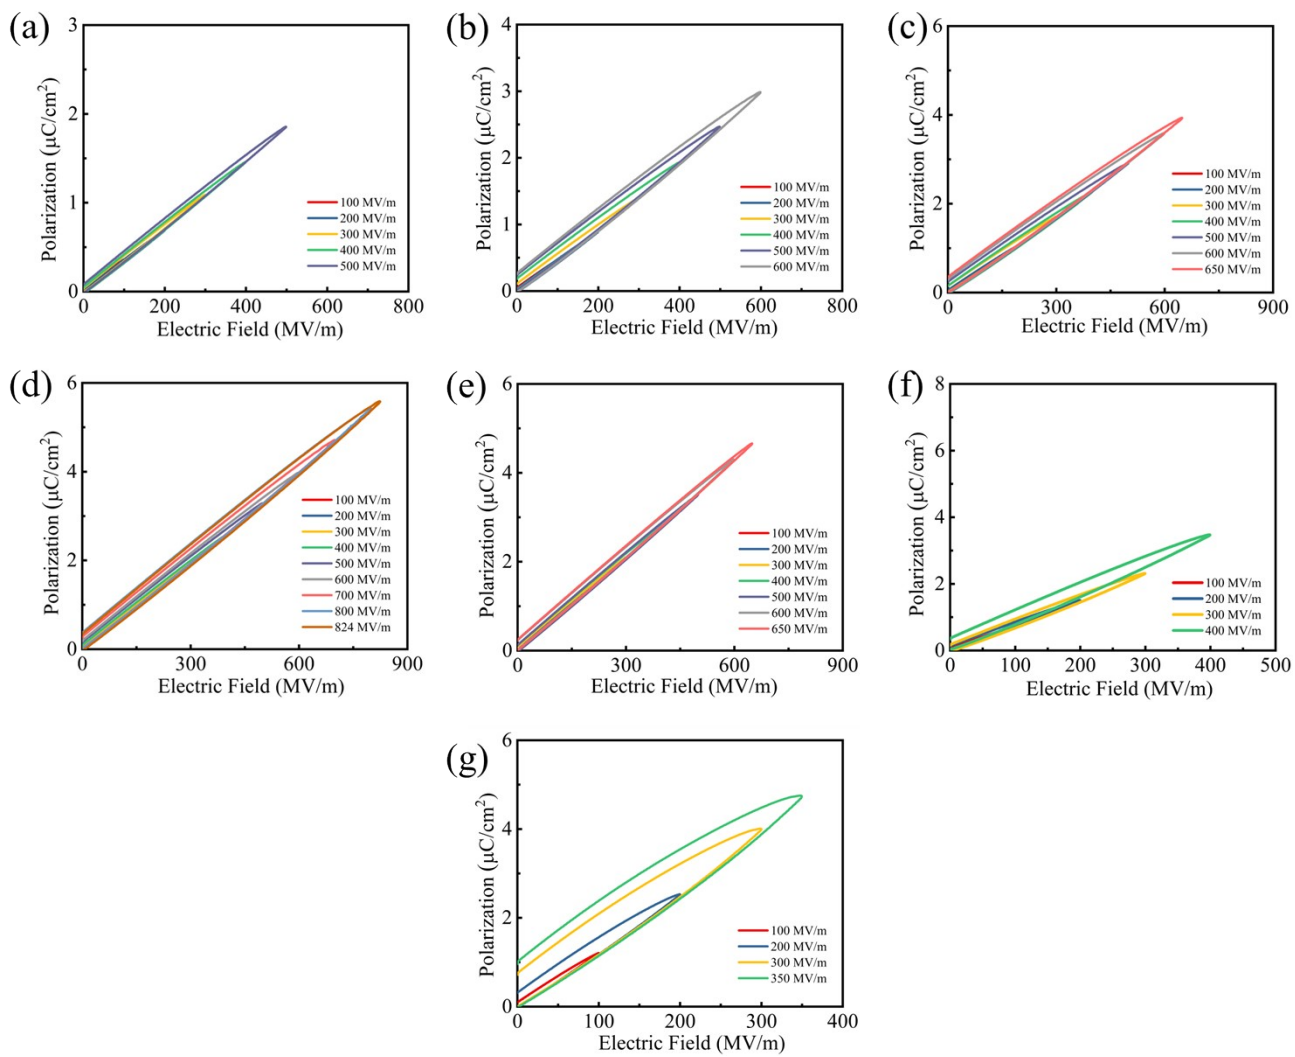

Figure S4. The  $P$ - $E$  loops of PESU, PP-0, PP-1, PP-2, PP-3, PP-4, and P(VDF-HFP) under different electric fields.
